# Supplementary material for: Using BiLSTM with attention mechanism to automatically detect self-admitted technical debt
Source: Springer Nature journal article supplement (doi:10.1007/s11704-020-9281-z), 2021-05-25
Supplement: 11704_2020_9281_MOESM1_ESM.pdf [file 11704_2020_9281_MOESM1_ESM.pdf]

Using BiLSTM with attention mechanism  
to automatically detect self-admitted  
technical debt

**Dongjin YU, Lin WANG, Xin CHEN, Jie CHEN**

Frontiers of Computer Science, DOI: [10.1007/s11704-020-9281-z](https://doi.org/10.1007/s11704-020-9281-z)

# Problems & Ideas

- **Problems of detecting self-admitted technical debt**

- Low detection accuracy
- Imbalanced positive/negative sample numbers
- Sharply varied comment lengths

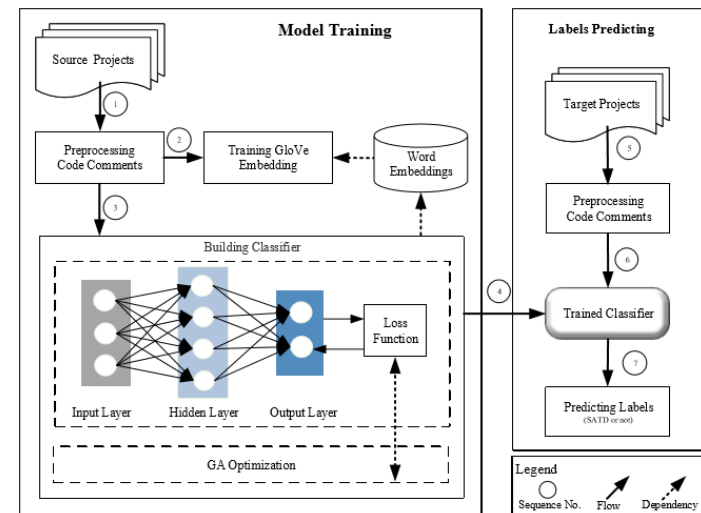

The overall framework of our approach

- **Ideas: Automatically identify self-admitted technical debt**

- Building a classifier to automatically identify self-admitted technical debt.
- Adopting a balanced cross entropy loss function to overcome the class imbalance problem.
- Applying genetic algorithms to adaptively learn the balancing factor of the loss function for improving the expansibility of our approach .

# Main Contributions

- We propose a new approach based on BiLSTM with the attention mechanism to automatically identify self-admitted technical debt.
- We conduct extensive experiments to evaluate the performance of the proposed approach and compare our approach with baseline methods on a public dataset. The results show that our approach outperforms these methods.

**F1-score of all methods on the 10 projects**

| <b>Project</b> | <b>Ours</b>   | <b>Patterns</b> | <b>NLP</b> | <b>Text Mining</b> |
|----------------|---------------|-----------------|------------|--------------------|
| Ant            | <b>61.22%</b> | 14.08%          | 52.10%     | 47.96%             |
| JMeter         | <b>84.81%</b> | 8.28%           | 79.00%     | 81.69%             |
| ArgoUML        | <b>87.54%</b> | 4.40%           | 86.80%     | 83.73%             |
| Columba        | <b>91.21%</b> | 10.53%          | 85.90%     | 84.36%             |
| EMF            | <b>60.62%</b> | 8.89%           | 44.70%     | 50.95%             |
| Hibernate      | <b>82.83%</b> | 12.23%          | 80.00%     | 79.01%             |
| JEdit          | <b>55.87%</b> | 26.71%          | 51.70%     | 43.93%             |
| JFreeChart     | <b>73.14%</b> | 8.70%           | 67.00%     | 69.46%             |
| JRuby          | <b>87.36%</b> | 8.69%           | 84.00%     | 83.98%             |
| Squirrel       | <b>73.98%</b> | 7.44%           | 62.90%     | 67.15%             |
| Average        | <b>75.86%</b> | 10.99%          | 69.41%     | 69.22%             |
